# Supplementary material for: The Impact of Intraspecies Variability on Growth Rate and Cellular Metabolic Activity of Bacteria Exposed to Rotating Magnetic Field
Source: MDPI journal article supplement (doi:10.3390/pathogens10111427), 2021-11-04
Supplement: s1 [file s1]

# Supplementary Material

## The Impact of Bacterial Intra-species Variability on Biological Effects Exerted by Rotating Magnetic Field

Marta Woroszyło<sup>1</sup>, Daria Ciecholewska-Juśko<sup>1</sup>, Adam Junka<sup>2,3\*</sup>, Agata Pruss<sup>4</sup>, Paweł Kwiatkowski<sup>5</sup>,  
Marcin Wardach<sup>6</sup>, Karol Fijałkowski<sup>1\*</sup>

<sup>1</sup>Department of Microbiology and Biotechnology, Faculty of Biotechnology and Animal Husbandry, West Pomeranian University of Technology in Szczecin, Piastów 45, 70-311 Szczecin, Poland; [marta.woroszylo@zut.edu.pl](mailto:marta.woroszylo@zut.edu.pl); [daria.ciecholewska@zut.edu.pl](mailto:daria.ciecholewska@zut.edu.pl); [karol.fijalkowski@zut.edu.pl](mailto:karol.fijalkowski@zut.edu.pl)

<sup>2</sup>Department of Pharmaceutical Microbiology and Parasitology, Faculty of Pharmacy, Medical University of Wrocław, Borowska 211a, 50-534 Wrocław, Poland; [adam.junka@umed.wroc.pl](mailto:adam.junka@umed.wroc.pl)

<sup>3</sup>Laboratory of Microbiology, Łukasiewicz Research Network-PORT Polish Center for Technology Development, 54-066 Wrocław, Poland; [adam.junka@port.lukasiewicz.gov.pl](mailto:adam.junka@port.lukasiewicz.gov.pl)

<sup>4</sup>Department of Laboratory Medicine, Chair of Microbiology, Immunology and Laboratory Medicine, Pomeranian Medical University in Szczecin, Powstańców Wielkopolskich 72, 70-111 Szczecin, Poland; [agata.pruss@pum.edu.pl](mailto:agata.pruss@pum.edu.pl)

<sup>5</sup>Department of Diagnostic Immunology, Chair of Microbiology, Immunology and Laboratory Medicine, Pomeranian Medical University in Szczecin, Powstańców Wielkopolskich 72, 70-111 Szczecin, Poland; [pawel.kwiatkowski@pum.edu.pl](mailto:pawel.kwiatkowski@pum.edu.pl)

<sup>6</sup>Faculty of Electrical Engineering, West Pomeranian University of Technology in Szczecin, Sikorskiego 37, 70-313 Szczecin, Poland; [marcin.wardach@zut.edu.pl](mailto:marcin.wardach@zut.edu.pl)

### \*Correspondence:

KF: [karol.fijalkowski@zut.edu.pl](mailto:karol.fijalkowski@zut.edu.pl); + 48 91-449-6714;

AJ: [adam.junka@umed.wroc.pl](mailto:adam.junka@umed.wroc.pl); +48 88-922-93-41.

**Table S1.** Phenotypic patterns of *S. aureus* strains.

| Phenotypic pattern | Strain number |   |   |   |   |   |   | ATCC<br>6538 |
|--------------------|---------------|---|---|---|---|---|---|--------------|
|                    | 1             | 2 | 3 | 4 | 5 | 6 | 7 |              |
| AMY                | -             | - | - | - | - | - | - | -            |
| APPA               | -             | - | - | - | - | - | - | -            |
| LeuA               | -             | - | - | - | - | - | - | -            |
| AlaA               | -             | - | - | - | - | - | - | -            |
| dRIB               | -             | - | - | - | - | - | + | -            |
| NOVO               | -             | + | - | - | - | - | + | -            |
| dRAF               | -             | - | - | - | - | - | - | -            |
| OPTO               | +             | + | + | + | + | + | + | +            |
| PIPLC              | -             | - | - | - | - | - | - | -            |
| CDEX               | -             | - | - | - | - | - | - | -            |
| ProA               | -             | - | - | - | - | - | - | -            |
| TyrA               | -             | - | - | - | - | - | - | -            |
| ILATk              | +             | - | + | - | - | + | + | +            |
| NC6.5              | +             | + | + | + | + | + | + | +            |
| O129R              | +             | + | + | + | + | + | + | -            |
| dXYL               | -             | - | - | - | - | - | - | -            |
| AspA               | -             | - | - | - | - | - | - | -            |
| BGURr              | -             | - | - | - | - | - | - | -            |
| dSOR               | -             | - | - | - | - | - | - | -            |
| LAC                | -             | - | + | - | - | - | - | -            |
| dMAN               | +             | + | + | + | + | + | + | +            |
| SAL                | -             | - | - | - | - | - | - | -            |
| ADH1               | +             | + | + | + | + | + | + | +            |
| BGAR               | -             | - | - | - | - | - | - | -            |
| AGAL               | -             | - | - | - | - | - | - | -            |
| URE                | -             | - | - | - | - | - | - | -            |
| NAG                | +             | + | + | - | + | + | + | +            |

|       |   |   |   |   |   |   |   |   |
|-------|---|---|---|---|---|---|---|---|
| dMNE  | + | + | + | + | + | + | + | + |
| SAC   | + | + | + | + | + | + | + | + |
| BGAL  | + | - | + | - | + | - | - | - |
| AMAN  | - | + | - | - | - | - | - | - |
| PyrA  | + | + | + | + | + | + | + | + |
| POLYB | + | + | + | + | + | + | + | + |
| dMAL  | + | + | + | + | + | + | + | + |
| MBdG  | + | - | - | + | + | + | + | - |
| dTRE  | + | + | + | + | + | + | + | + |
| AGLU  | + | + | - | + | + | + | + | - |
| PHOS  | + | + | + | + | + | + | + | + |
| BGUR  | - | - | - | - | - | - | - | - |
| dGAL  | + | + | + | - | + | - | - | + |
| BACI  | + | + | + | + | + | + | + | + |
| PUL   | - | - | - | - | - | - | - | - |
| ADH2s | + | - | - | - | - | - | - | + |

AMY - D-Amygdalin; APPA - Ala Phe Pro arylamidase; LeuA - Leucine arylamidase; AlaA - Alanine arylamidase; dRIB - D-Ribose; NOVO - Novobiocin resistance ; dRAF - D-Raffinose; OPTO - Optochin resistance; PIPLC - Phosphatidylinositol phospholipase C; CDEX - Cyclodextrin; ProA - L-Proline arylamidase; TyrA - Tyrosine arylamidase; ILATk - L-Lactate alkalinization; NC6.5 - Growth in 6.5% NaCl; O129R - O/129 Resistance (comp. vibrio.); dXYL - D-Xylose; AspA - L-Aspartate arylamidase; BGURr -  $\beta$ -Glucaronidase; dSOR - D-Sorbitol; LAC - Lactose; dMAN - D-Mannitol; SAL - Salicin; ADH1 - Arginine dihydrolase 1; BGAR -  $\beta$ -Galactopyranosidase; AGAL -  $\alpha$ -Galactosidase; URE - Urease; NAG - N-Acetyl-D-glucosamine; dMNE - D-Mannose; SAC - Saccharose/sucrose; BGAL -  $\beta$ -Galactosidase; AMAN -  $\alpha$ -Mannosidase; PyrA - L-Pyrrolidonyl-arylamidase; POLYB - Polymixin B resistance; dMAL - D-Maltose; MBdG - Methyl- $\beta$ -D-glucopyranoside; dTRE - D-Trehalose; AGLU -  $\alpha$ -Glucosidase; PHOS - Phosphatase; BGUR -  $\beta$ -Glucaronidase; dGAL - D-Galactose; BACI - Bacitracin resistance; PUL - Pullulan; ADH2s - Arginine dihydrolase 2;

## The study of growth dynamics and cellular metabolic activity – statistical analyses

**Table S2.** Statistical differences in growth dynamics between *S. aureus* strains representing different clonal types exposed for 3 h to rotating magnetic field of 5 Hz.

|           | ATCC 6538 | 1   | 2 | 3 | 4  | 5 | 6    | 7  | control |
|-----------|-----------|-----|---|---|----|---|------|----|---------|
| ATCC 6538 | x         | -   | - | - | -  | - | -    | -  | -       |
| 1         | -         | x   | - | - | -  | - | ***  | -  | -       |
| 2         | -         | -   | x | - | -  | - | -    | -  | -       |
| 3         | -         | -   | - | x | -  | - | *    | -  | -       |
| 4         | -         | -   | - | - | x  | - | **   | -  | -       |
| 5         | -         | -   | - | - |    | x | -    | -  | -       |
| 6         | -         | *** | - | * | ** | - | x    | ** | ****    |
| 7         | -         | -   | - | - | -  | - | **   | x  | -       |
| control   | -         | -   | - | - | -  | - | **** | -  | x       |

\* p<0.05, \*\* p<0.01, \*\*\* p<0.001, \*\*\*\* p<0.0001

**Table S3.** Statistical differences in growth dynamics between *S. aureus* strains representing different clonal types exposed for 6 h to rotating magnetic field of 5 Hz.

|           | ATCC 6538 | 1  | 2    | 3 | 4 | 5 | 6 | 7 | control |
|-----------|-----------|----|------|---|---|---|---|---|---------|
| ATCC 6538 | x         | ** | **** | - | - | - | * | - | *       |
| 1         | **        | x  | -    | - | - | - | - | - | -       |
| 2         | ****      | -  | x    |   | * | * | - | * | -       |
| 3         | -         | -  |      | x | - | - | - | - | -       |
| 4         | -         | -  | *    | - | x |   | - | - | -       |
| 5         | -         | -  | *    | - | - | x | - | - | -       |
| 6         | *         | -  |      | - | - | - | x | - | -       |
| 7         | -         | -  | *    | - | - | - | - | x | -       |
| control   | *         | -  | -    | - | - | - | - | - | x       |

\* p<0.05, \*\* p<0.01, \*\*\* p<0.001, \*\*\*\* p<0.0001

**Table S4.** Statistical differences in growth dynamics between *S. aureus* strains representing different clonal types exposed for 9 h to rotating magnetic field of 5 Hz.

|           | ATCC 6538 | 1    | 2    | 3    | 4    | 5    | 6    | 7   | control |
|-----------|-----------|------|------|------|------|------|------|-----|---------|
| ATCC 6538 | x         | -    | **** | **** | *    | -    | **** | *** | ****    |
| 1         | -         | x    | **** | **   | -    | -    | **** | *   | ***     |
| 2         | ****      | **** | x    | -    | **** | **** | -    | **  | **      |
| 3         | ****      | **   | -    | x    | -    | **   | -    | -   | -       |
| 4         | *         | -    | **** | -    | x    | -    | -    | -   | -       |
| 5         | -         | -    | **** | **   | -    | x    | ***  | -   | **      |
| 6         | ****      | **** | -    | -    | -    | ***  | x    | -   | -       |
| 7         | ***       | *    | **   | -    | -    | -    | -    | x   | -       |
| control   | ****      | ***  | **   | -    | -    | **   | -    | -   | x       |

\* p<0.05, \*\* p<0.01, \*\*\* p<0.001, \*\*\*\* p<0.0001

**Table S5.** Statistical differences in growth dynamics of *S. aureus* strains representing different clonal types depending on the duration (3, 6 and 9 h) of rotating magnetic field (5 Hz) exposure.

| <i>S.aureus</i> strain |           |      |      |
|------------------------|-----------|------|------|
|                        | ATCC 6538 |      |      |
|                        | 3 h       | 6 h  | 9 h  |
| 3 h                    | x         | **** | **** |
| 6 h                    | ****      | x    | -    |
| 9 h                    | ****      | -    | x    |
| 1                      |           |      |      |
|                        | 3 h       | 6 h  | 9 h  |
| 3 h                    | x         | -    | -    |
| 6 h                    | -         | x    | ***  |
| 9 h                    | -         | ***  | x    |
| 2                      |           |      |      |
|                        | 3 h       | 6 h  | 9 h  |
| 3 h                    | x         | -    | -    |
| 6 h                    | -         | x    | -    |
| 9 h                    | -         | -    | x    |

| 3   |     |     |     |
|-----|-----|-----|-----|
|     | 3 h | 6 h | 9 h |
| 3 h | x   | -   | -   |
| 6 h | -   | x   | -   |
| 9 h | -   | -   | x   |
| 4   |     |     |     |
|     | 3 h | 6 h | 9 h |
| 3 h | x   | -   | -   |
| 6 h | -   | x   | -   |
| 9 h | -   | -   | x   |
| 5   |     |     |     |
|     | 3 h | 6 h | 9 h |
| 3 h | x   | -   | -   |
| 6 h | -   | x   | -   |
| 9 h | -   | -   | x   |
| 6   |     |     |     |
|     | 3 h | 6 h | 9 h |
| 3 h | x   | **  | -   |
| 6 h | **  | x   | -   |
| 9 h | -   | -   | x   |
| 7   |     |     |     |
|     | 3 h | 6 h | 9 h |
| 3 h | x   | -   | -   |
| 6 h | -   | x   | -   |
| 9 h | -   | -   | x   |

\* p<0.05, \*\* p<0.01, \*\*\* p<0.001, \*\*\*\* p<0.0001

**Table S6.** Statistical differences in growth dynamics between *S. aureus* strains representing different clonal types exposed for 3 h to rotating magnetic field of 50 Hz.

|           | ATCC 6538 | 1  | 2   | 3   | 4    | 5   | 6    | 7 | control |
|-----------|-----------|----|-----|-----|------|-----|------|---|---------|
| ATCC 6538 | x         | -  | -   | -   | -    | -   | -    | - | -       |
| 1         | -         | x  | -   | -   | **   | -   | -    | - | -       |
| 2         | -         | -  | x   | -   | ***  | -   | -    | - | *       |
| 3         | -         | -  | -   | x   | -    | -   | ***  | - | -       |
| 4         | -         | ** | *** | -   | x    | *** | **** | - | -       |
| 5         | -         | -  | -   | -   | ***  | x   | -    | - | *       |
| 6         | -         | -  | -   | *** | **** | -   | x    | - | ****    |
| 7         | -         | -  | -   | -   | -    | -   | -    | x | -       |
| control   | -         | -  | *   | -   | -    | *   | **** | - | x       |

\* p<0.05, \*\* p<0.01, \*\*\* p<0.001, \*\*\*\* p<0.0001

**Table S7.** Statistical differences in growth dynamics between *S. aureus* strains representing different clonal types exposed for 6 h to rotating magnetic field of 50 Hz.

|           | ATCC 6538 | 1    | 2   | 3 | 4 | 5 | 6 | 7   | control |
|-----------|-----------|------|-----|---|---|---|---|-----|---------|
| ATCC 6538 | x         | **** | *** | * | - | - | - | -   | -       |
| 1         | ****      | x    | -   | - | - | - | - | *** | *       |
| 2         | ***       | -    | x   | - | - | - | - | *   | -       |
| 3         | *         | -    | -   | x | - | - | - | -   | -       |
| 4         | -         | -    | -   | - | x | - | - | -   | -       |
| 5         | -         | -    | -   | - | - | x | - | -   | -       |
| 6         | -         | -    | -   | - | - | - | x | -   | -       |
| 7         | -         | ***  | *   | - | - | - | - | x   | -       |
| control   | -         | *    | -   | - | - | - | - | -   | x       |

\* p<0.05, \*\* p<0.01, \*\*\* p<0.001, \*\*\*\* p<0.0001

**Table S8.** Statistical differences in growth dynamics between *S. aureus* strains representing different clonal types exposed for 9 h to rotating magnetic field of 50 Hz.

|           | ATCC 6538 | 1    | 2    | 3   | 4    | 5  | 6    | 7  | control |
|-----------|-----------|------|------|-----|------|----|------|----|---------|
| ATCC 6538 | x         | -    | **** | *** | -    | -  | **** | ** | ***     |
| 1         | -         | x    | **** | *** | -    | -  | **** | ** | ***     |
| 2         | ****      | **** | x    | -   | **** | ** | -    | -  | *       |
| 3         | ***       | ***  | -    | x   | -    | -  | -    | -  | -       |
| 4         | -         | -    | **** | -   | x    | -  | *    | -  | -       |
| 5         | -         | -    | **   | -   | -    | x  | -    | -  | -       |
| 6         | ****      | **** | -    | -   | *    | -  | x    | -  | -       |
| 7         | **        | **   | -    | -   | -    | -  | -    | x  | -       |
| control   | ***       | ***  | *    | -   | -    | -  | -    | -  | x       |

\* p<0.05, \*\* p<0.01, \*\*\* p<0.001, \*\*\*\* p<0.0001

**Table S9.** Statistical differences in growth dynamics of *S. aureus* strains representing different clonal types depending on the duration (3, 6 and 9 h) of rotating magnetic field (50 Hz) exposure.

| <i>S.aureus</i> strain |           |      |      |
|------------------------|-----------|------|------|
|                        | ATCC 6538 |      |      |
|                        | 3 h       | 6 h  | 9 h  |
| 3 h                    | x         | **   | **** |
| 6 h                    | **        | x    | -    |
| 9 h                    | ****      | -    | x    |
|                        | 1         |      |      |
|                        | 3 h       | 6 h  | 9 h  |
| 3 h                    | x         | -    | **** |
| 6 h                    | -         | x    | **** |
| 9 h                    | ****      | **** | x    |
|                        | 2         |      |      |
|                        | 3 h       | 6 h  | 9 h  |
| 3 h                    | x         | -    | -    |
| 6 h                    | -         | x    | -    |
| 9 h                    | -         | -    | x    |



| 3   |     |     |     |
|-----|-----|-----|-----|
|     | 3 h | 6 h | 9 h |
| 3 h | x   | -   | -   |
| 6 h | -   | x   | -   |
| 9 h | -   | -   | x   |
| 4   |     |     |     |
|     | 3 h | 6 h | 9 h |
| 3 h | x   | -   | -   |
| 6 h | -   | x   | -   |
| 9 h | -   | -   | x   |
| 5   |     |     |     |
|     | 3 h | 6 h | 9 h |
| 3 h | x   | -   | **  |
| 6 h | -   | x   | -   |
| 9 h | **  | -   | x   |
| 6   |     |     |     |
|     | 3 h | 6 h | 9 h |
| 3 h | x   | *** | -   |
| 6 h | *** | x   | -   |
| 9 h | -   | -   | x   |
| 7   |     |     |     |
|     | 3 h | 6 h | 9 h |
| 3 h | x   | -   | -   |
| 6 h | -   | x   | -   |
| 9 h | -   | -   | x   |

\* p<0.05, \*\* p<0.01, \*\*\* p<0.001, \*\*\*\* p<0.0001

**Table S10.** Statistical differences in growth dynamics of *S. aureus* strains representing different clonal types exposed to rotating magnetic field (5 Hz v. 50 Hz).

| <i>S.aureus</i> strain/Time of exposition | 5 Hz v. 50 Hz | <i>S.aureus</i> strain/Time of exposition | 5 Hz v. 50 Hz |
|-------------------------------------------|---------------|-------------------------------------------|---------------|
| ATCC 6538/3h                              | -             | 4/3h                                      | -             |
| ATCC 6538/6h                              | -             | 4/6h                                      | -             |
| ATCC 6538/9 h                             | -             | 4/9h                                      | -             |
| 1/3h                                      | -             | 5/3h                                      | -             |
| 1/6h                                      | -             | 5/6h                                      | -             |
| 1/9h                                      | -             | 5/9h                                      | -             |
| 2/3h                                      | -             | 6/3h                                      | -             |
| 2/6h                                      | -             | 6/6h                                      | -             |
| 2/9h                                      | -             | 6/9h                                      | -             |
| 3/3h                                      | -             | 7/3h                                      | -             |
| 3/6h                                      | -             | 7/6h                                      | -             |
| 3/9h                                      | -             | 7/9h                                      | -             |

\* p<0.05, \*\* p<0.01, \*\*\* p<0.001, \*\*\*\* p<0.0001

**Table S11.** Statistical differences in cellular metabolic activity between *S. aureus* strains representing different clonal types exposed for 3 h to rotating magnetic field of 5 Hz.

|           | ATCC 6538 | 1    | 2    | 3    | 4    | 5    | 6    | 7    | control |
|-----------|-----------|------|------|------|------|------|------|------|---------|
| ATCC 6538 | x         | -    | **   | **** | **** | **** | -    | *    | -       |
| 1         | -         | x    | -    | *    | **** | **** | -    | **** | -       |
| 2         | **        | -    | x    |      | **** | **** | **   | **** | -       |
| 3         | ****      | *    | -    | x    | **** | **** | **** | **** | **      |
| 4         | ****      | **** | **** | **** | x    | -    | **** | -    | ****    |
| 5         | ****      | **** | **** | **** |      | x    | **** | -    | ****    |
| 6         | -         | -    | **   | **** | **** | **** | x    | -    | -       |
| 7         | *         | **** | **** | **** | -    | -    | -    | x    | ****    |
| control   | -         | -    | -    | **   | **** | **** | -    | **** | x       |

\* p<0.05, \*\* p<0.01, \*\*\* p<0.001, \*\*\*\* p<0.0001

**Table S12.** Statistical differences in cellular metabolic activity between *S. aureus* strains representing different clonal types exposed for 6 h to rotating magnetic field of 5 Hz.

|           | ATCC 6538 | 1    | 2    | 3    | 4    | 5    | 6    | 7    | control |
|-----------|-----------|------|------|------|------|------|------|------|---------|
| ATCC 6538 | x         | -    | -    | -    | **   | **** | **** | **** | -       |
| 1         | -         | x    | -    | -    | **   | **** | ***  | **** | -       |
| 2         | -         | -    | x    | -    | **   | **** | ***  | **** | -       |
| 3         | -         | -    | -    | x    | ***  | **** | **** | **** | -       |
| 4         | **        | **   | **   | ***  | x    | **** | -    | -    | -       |
| 5         | ****      | **** | **** | **** | **** | x    | **** | **** | ****    |
| 6         | ****      | ***  | ***  | **** | -    | **** | x    | -    | -       |
| 7         | ****      | **** | **** | **** | -    | **** | -    | x    | **      |
| control   | -         | -    | -    | -    | -    | **** | -    | **   | x       |

\* p<0.05, \*\* p<0.01, \*\*\* p<0.001, \*\*\*\* p<0.0001

**Table S13.** Statistical differences in cellular metabolic activity between *S. aureus* strains representing different clonal types exposed for 9 h to rotating magnetic field of 5 Hz.

|           | ATCC 6538 | 1    | 2    | 3    | 4    | 5    | 6    | 7    | control |
|-----------|-----------|------|------|------|------|------|------|------|---------|
| ATCC 6538 | x         | **   | -    | -    | *    | *    | **** | **** | -       |
| 1         | **        | x    | -    | -    | -    | **** | **** | **** | ***     |
| 2         | -         | -    | x    | -    | -    | **** | **** | **** | -       |
| 3         | -         | -    | -    | x    | -    | **** | **** | **** | -       |
| 4         | *         | -    | -    |      | x    | **** | **** | **** | **      |
| 5         | *         | **** | **** | **** | **** | x    | **** | **** | ***     |
| 6         | ****      | **** | **** | **** | **** | **** | x    | -    | ****    |
| 7         | ****      | **** | **** | **** | **** | **** | -    | x    | ****    |
| control   | -         | ***  | -    | -    | **   | ***  | **** | **** | x       |

\* p<0.05, \*\* p<0.01, \*\*\* p<0.001, \*\*\*\* p<0.0001

**Table S14.** Statistical differences in cellular metabolic activity of *S. aureus* strains representing different clonal types depending on the duration (3, 6 and 9 h) of rotating magnetic field (5 Hz) exposure.

| <i>S.aureus</i> strain |      |      |      |
|------------------------|------|------|------|
| ATCC 6538              |      |      |      |
|                        | 3 h  | 6 h  | 9 h  |
| 3 h                    | x    | **   | -    |
| 6 h                    | **   | x    | -    |
| 9 h                    | -    | -    | x    |
| 1                      |      |      |      |
|                        | 3 h  | 6 h  | 9 h  |
| 3 h                    | x    | -    | *    |
| 6 h                    | -    | x    | -    |
| 9 h                    | *    | -    | x    |
| 2                      |      |      |      |
|                        | 3 h  | 6 h  | 9 h  |
| 3 h                    | x    | -    | -    |
| 6 h                    | -    | x    | -    |
| 9 h                    | -    | -    | x    |
| 3                      |      |      |      |
|                        | 3 h  | 6 h  | 9 h  |
| 3 h                    | x    | -    | -    |
| 6 h                    | -    | x    | -    |
| 9 h                    | -    | -    | x    |
| 4                      |      |      |      |
|                        | 3 h  | 6 h  | 9 h  |
| 3 h                    | x    | **** | **** |
| 6 h                    | **** | x    | **** |
| 9 h                    | **** | **** | x    |
| 5                      |      |      |      |
|                        | 3 h  | 6 h  | 9 h  |
| 3 h                    | x    | -    | *    |
| 6 h                    | -    | x    | **** |
| 9 h                    | *    | **** | x    |
| 6                      |      |      |      |
|                        | 3 h  | 6 h  | 9 h  |

|     |      |      |      |
|-----|------|------|------|
| 3 h | x    | -    | **** |
| 6 h | -    | x    | **** |
| 9 h | **** | **** | x    |
| 7   |      |      |      |
|     | 3 h  | 6 h  | 9 h  |
| 3 h | x    | -    | **** |
| 6 h | -    | x    | **** |
| 9 h | **** | **** | x    |

\* p<0.05, \*\* p<0.01, \*\*\* p<0.001, \*\*\*\* p<0.0001

**Table S15.** Statistical differences in cellular metabolic activity between *S. aureus* strains representing different clonal types exposed for 3 h to rotating magnetic field of 50 Hz.

|           | ATCC 6538 | 1    | 2    | 3    | 4    | 5    | 6    | 7    | control |
|-----------|-----------|------|------|------|------|------|------|------|---------|
| ATCC 6538 | x         | -    | **** | **** | **   | -    | -    | **   | ****    |
| 1         | -         | x    | **** | **** | **   | -    | -    | **   | ****    |
| 2         | ****      | **** | x    | -    | **** | **** | *    | **** | -       |
| 3         | ****      | **** | -    | x    | **** | **** | **   | **** | -       |
| 4         | **        | **   | **** | **** | x    | ***  | **** | -    | ****    |
| 5         | -         | -    | **** | **** | ***  | x    | -    | ***  | ***     |
| 6         | -         | -    | *    | **   | **** | -    | x    | **** | -       |
| 7         | **        | **   | **** | **** | -    | ***  | **** | x    | ****    |
| control   | ****      | **** | -    | -    | **** | ***  | -    | **** | x       |

\* p<0.05, \*\* p<0.01, \*\*\* p<0.001, \*\*\*\* p<0.0001

**Table S16.** Statistical differences in cellular metabolic activity between *S. aureus* strains representing different clonal types exposed for 6 h to rotating magnetic field of 50 Hz.

|           | ATCC 6538 | 1    | 2    | 3    | 4    | 5    | 6    | 7   | control |
|-----------|-----------|------|------|------|------|------|------|-----|---------|
| ATCC 6538 | x         | -    | -    | -    | -    | **** | *    | *** | -       |
| 1         | -         | x    | -    | -    | -    | **** | -    | **  | -       |
| 2         | -         | -    | x    | -    | -    | **** | -    | *   | -       |
| 3         | -         | -    | -    | x    | -    | **** | -    | *** | -       |
| 4         | -         | -    | -    | -    | x    | **** | -    | -   | -       |
| 5         | ****      | **** | **** | **** | **** | x    | **** | **  | ****    |
| 6         | *         | -    | -    | -    | -    | **** | x    | -   | -       |
| 7         | ***       | **   | *    | ***  | -    | **   | -    | x   | -       |
| control   | -         | -    | -    | -    | -    | **** | -    | -   | x       |

\* p<0.05, \*\* p<0.01, \*\*\* p<0.001, \*\*\*\* p<0.0001

**Table S17.** Statistical differences in cellular metabolic activity between *S. aureus* strains representing different clonal types exposed for 9 h to rotating magnetic field of 50 Hz.

|           | ATCC 6538 | 1    | 2    | 3    | 4    | 5    | 6    | 7    | control |
|-----------|-----------|------|------|------|------|------|------|------|---------|
| ATCC 6538 | x         | ***  | -    | -    | **** | ***  | -    | -    | -       |
| 1         | ***       | x    | -    | **   | -    | -    | **** | **   | -       |
| 2         | -         | -    | x    | -    | **** | -    | **** | -    | -       |
| 3         | -         | **   | -    | x    | **** | *    | -    | -    | -       |
| 4         | ****      | -    | **** | **** | x    | **   | **** | **** | ****    |
| 5         | ****      | -    | -    | *    | **   | x    | **** | **   | -       |
| 6         | -         | **** | **** | -    | **** | **** | x    | -    | ****    |
| 7         | -         | **   | -    | -    | **** | **   | -    | x    | -       |
| control   | -         | -    | -    | -    | **** | -    | **** | -    | x       |

\* p<0.05, \*\* p<0.01, \*\*\* p<0.001, \*\*\*\* p<0.0001

**Table S18.** Statistical differences in cellular metabolic activity of *S. aureus* strains representing different clonal types depending on the duration (3, 6 and 9 h) of rotating magnetic field (50 Hz) exposure.

| <i>S.aureus</i> strain |      |      |      |
|------------------------|------|------|------|
| ATCC 6538              |      |      |      |
|                        | 3 h  | 6 h  | 9 h  |
| 3 h                    | x    | **** | -    |
| 6 h                    | **** | x    | ***  |
| 9 h                    | -    | ***  | x    |
| 1                      |      |      |      |
|                        | 3 h  | 6 h  | 9 h  |
| 3 h                    | x    | **** | **** |
| 6 h                    | **** | x    | -    |
| 9 h                    | **** | -    | x    |
| 2                      |      |      |      |
|                        | 3 h  | 6 h  | 9 h  |
| 3 h                    | x    | -    | -    |
| 6 h                    | -    | x    | -    |
| 9 h                    | -    | -    | x    |
| 3                      |      |      |      |
|                        | 3 h  | 6 h  | 9 h  |
| 3 h                    | x    | -    | *    |
| 6 h                    | -    | x    | *    |
| 9 h                    | *    | *    | x    |
| 4                      |      |      |      |
|                        | 3 h  | 6 h  | 9 h  |
| 3 h                    | x    | **** | **** |
| 6 h                    | **** | x    | **** |
| 9 h                    | **** | **** | x    |
| 5                      |      |      |      |
|                        | 3 h  | 6 h  | 9 h  |
| 3 h                    | x    | -    | **** |
| 6 h                    | -    | x    | **** |
| 9 h                    | **** | **** | x    |

| 6   |      |      |      |
|-----|------|------|------|
|     | 3 h  | 6 h  | 9 h  |
| 3 h | x    | -    | -    |
| 6 h | -    | x    | *    |
| 9 h | -    | *    | x    |
| 7   |      |      |      |
|     | 3 h  | 6 h  | 9 h  |
| 3 h | x    | **** | **** |
| 6 h | **** | x    | -    |
| 9 h | **** | -    | x    |

\* p<0.05, \*\* p<0.01, \*\*\* p<0.001, \*\*\*\* p<0.0001

**Table S19.** Statistical differences in cellular metabolic activity of *S. aureus* strains representing different clonal types exposed to rotating magnetic field (5 Hz v. 50 Hz).

| <i>S. aureus</i> strain/Time<br>of exposition | 5 Hz v. 50 Hz | <i>S. aureus</i> strain/Time<br>of exposition | 5 Hz v. 50 Hz |
|-----------------------------------------------|---------------|-----------------------------------------------|---------------|
| ATCC 6538/3h                                  | -             | 4/3h                                          | -             |
| ATCC 6538/6h                                  | -             | 4/6h                                          | -             |
| ATCC 6538/9 h                                 | -             | 4/9h                                          | -             |
| 1/3h                                          | **            | 5/3h                                          | *             |
| 1/6h                                          | -             | 5/6h                                          | -             |
| 1/9h                                          | -             | 5/9h                                          | ****          |
| 2/3h                                          | -             | 6/3h                                          | -             |
| 2/6h                                          | -             | 6/6h                                          | -             |
| 2/9h                                          | -             | 6/9h                                          | *             |
| 3/3h                                          | -             | 7/3h                                          | -             |
| 3/6h                                          | -             | 7/6h                                          | -             |
| 3/9h                                          | -             | 7/9h                                          | ****          |

\* p<0.05, \*\* p<0.01, \*\*\* p<0.001, \*\*\*\* p<0.0001



**Table 20.** The values of magnetic induction inside the RMF generator, at the location of the Petri dishes, depending on the applied AC frequency.

| Magnetic induction<br>[mT] | 5 Hz  | 50 Hz |
|----------------------------|-------|-------|
| MIN                        | 17.23 | 17.95 |
| MAX                        | 21.88 | 22.77 |
| Average                    | 19.20 | 19.99 |

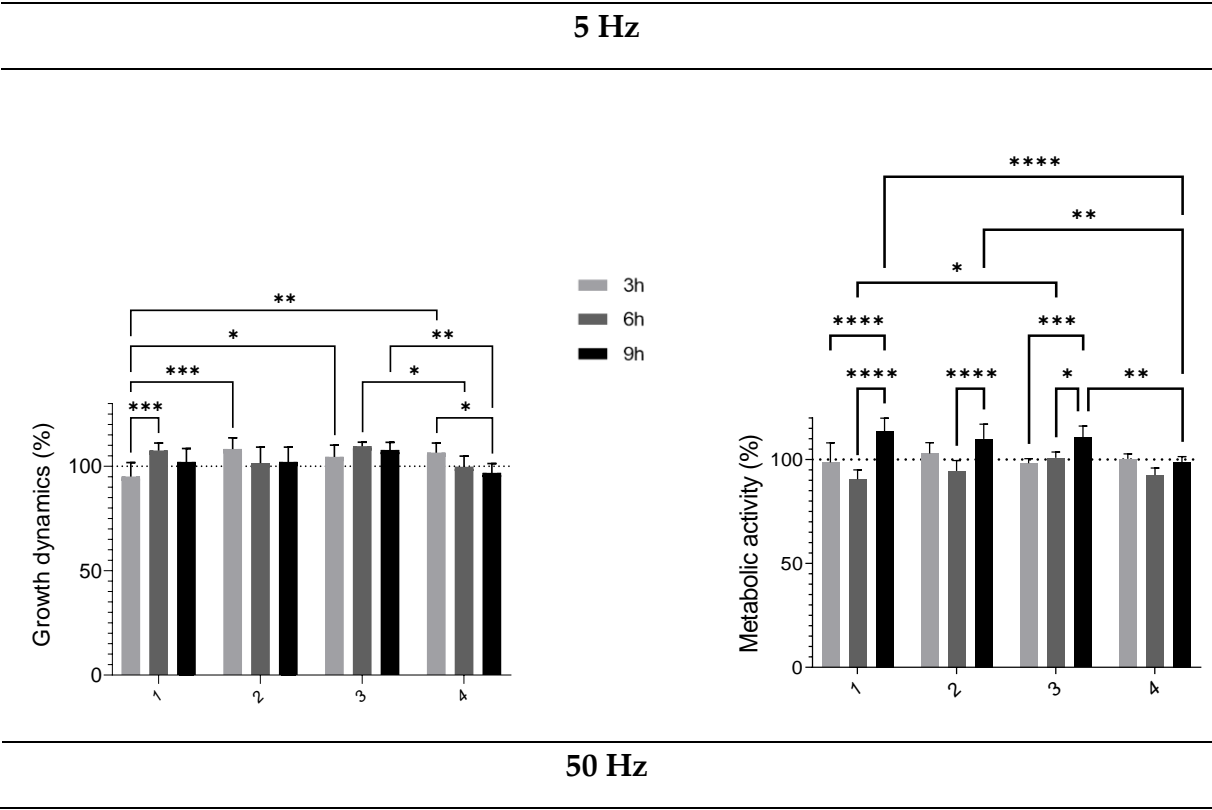

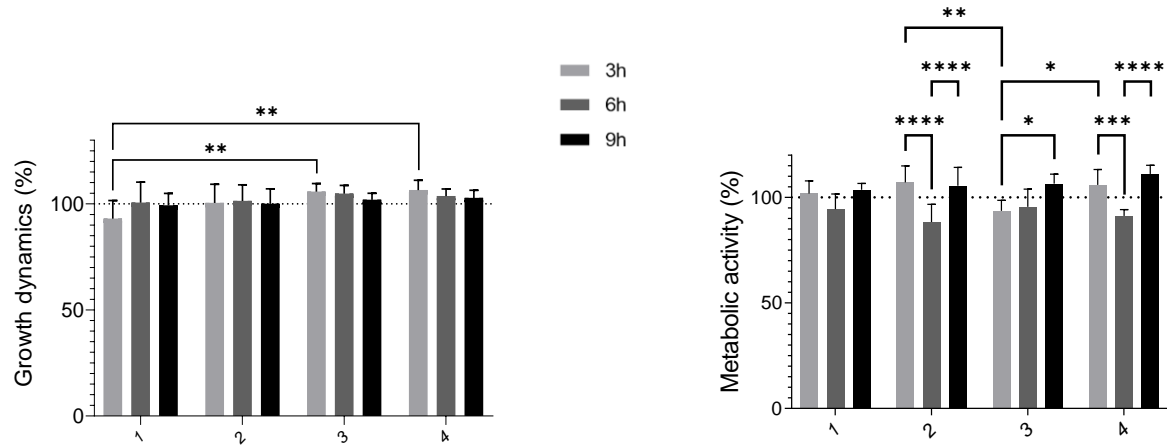

**Figure S1.** Statistical differences in growth dynamics and cellular metabolic activity between *S.aureus* strains representing one clonal type exposed to rotating magnetic field (5 Hz and 50 Hz) for 3, 6 and 9 h.

Data are expressed as % of control. The results are presented as a mean  $\pm$  SEM calculated using six values (three from each biological replicate); \*  $p < 0.05$ , \*\*  $p < 0.01$ , \*\*\*  $p < 0.001$ , \*\*\*\*  $p < 0.0001$ .

---

## 5 Hz

---

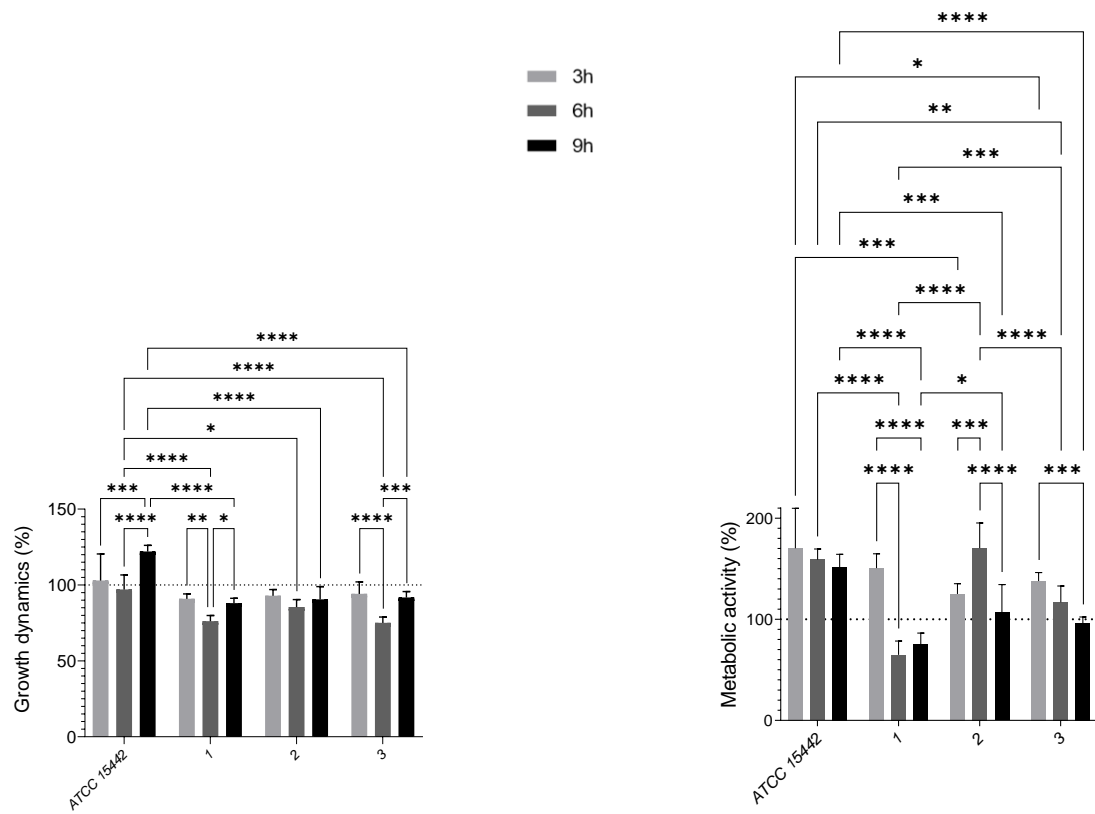

---

## 50 Hz

---

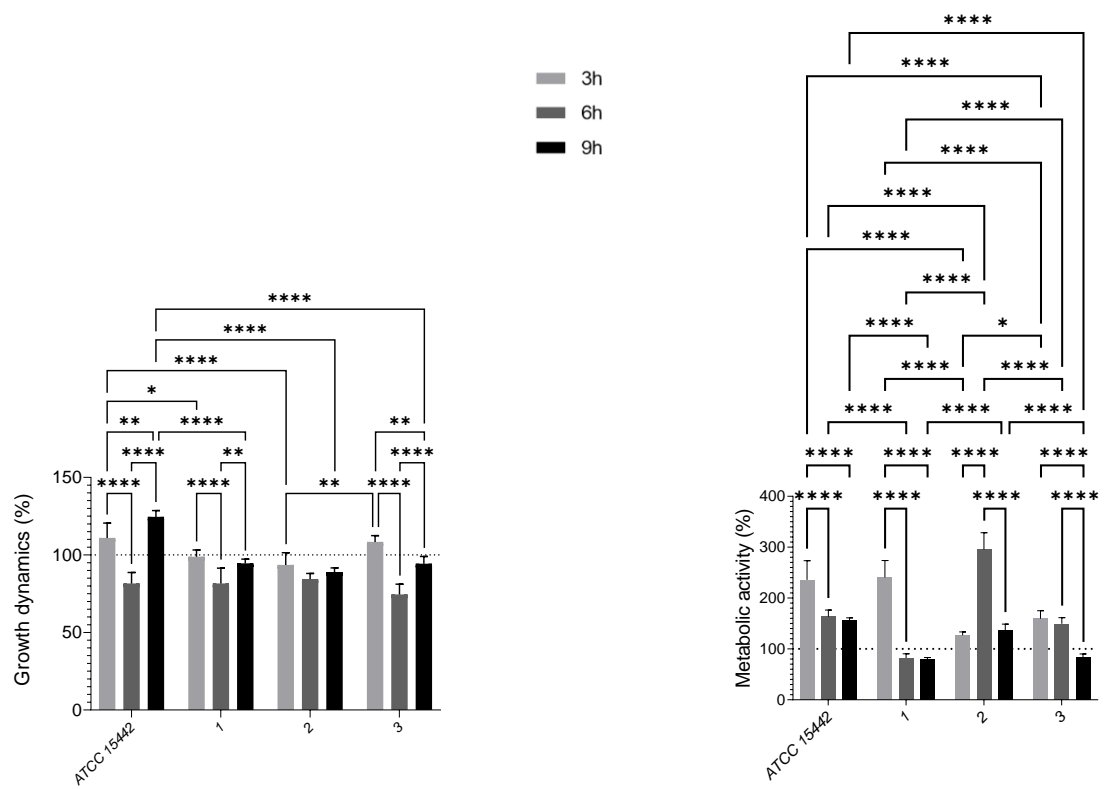

**Figure S2.** Statistical differences in growth dynamics and cellular metabolic activity between *P.aeruginosa* strains exposed to rotating magnetic field (5 Hz and 50 Hz) for 3, 6 and 9 h.

Data are expressed as % of control. The results are presented as a mean  $\pm$  SEM calculated using six values (three from each biological replicate); \*  $p < 0.05$ , \*\*  $p < 0.01$ , \*\*\*  $p < 0.001$ , \*\*\*\*  $p < 0.0001$ .

## 5 Hz

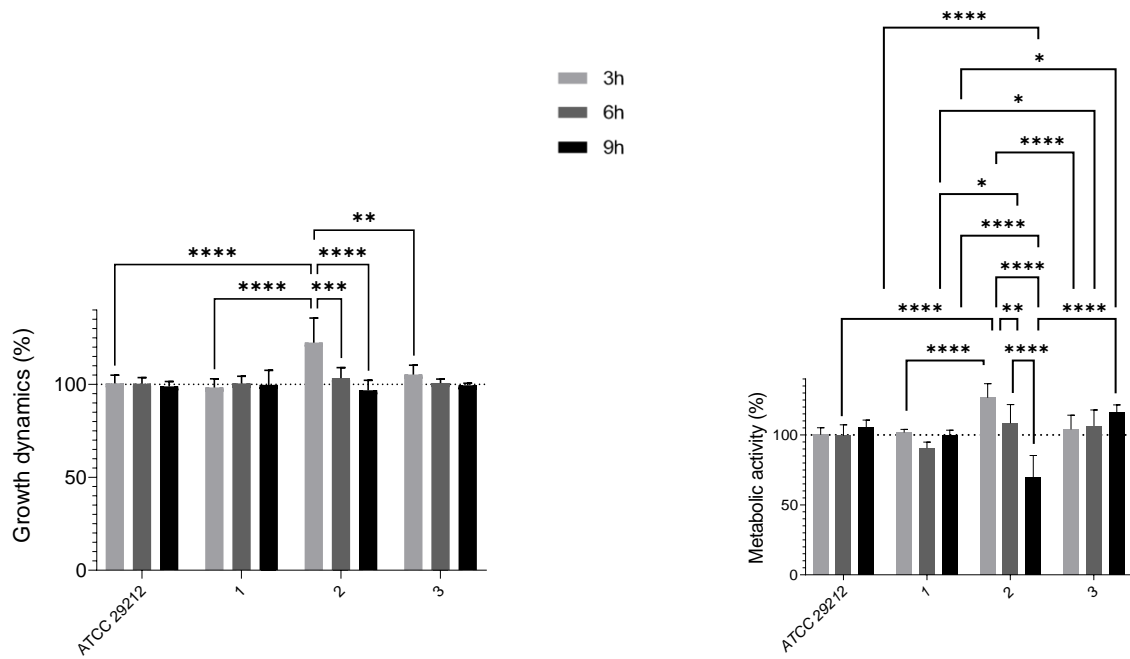

## 50 Hz

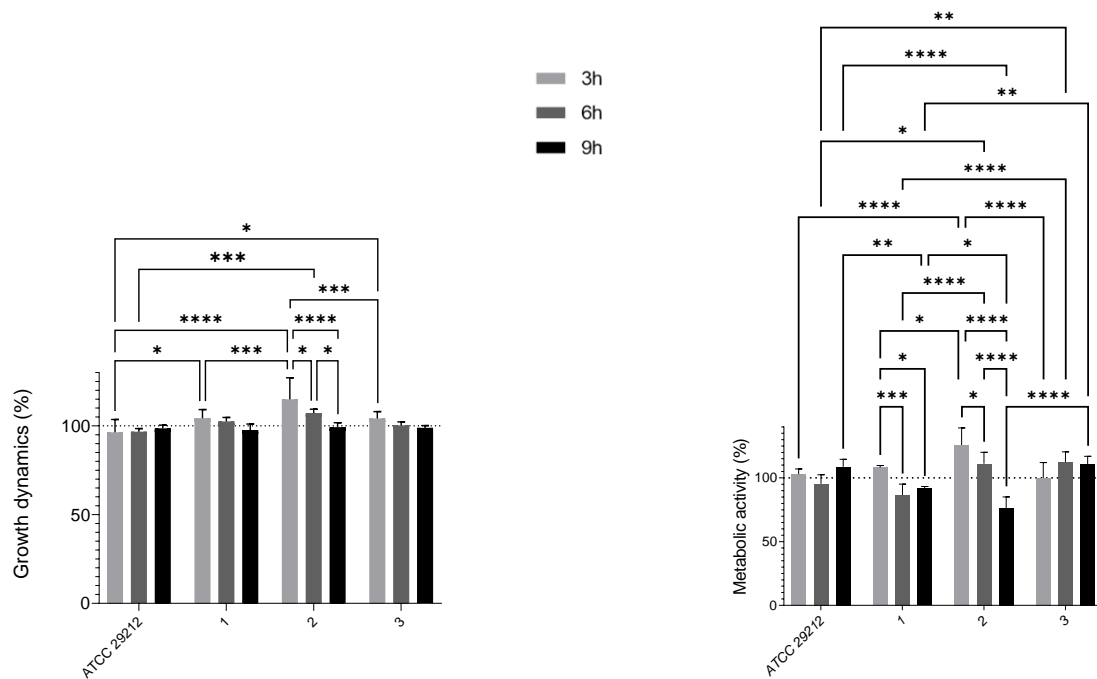

**Figure S3.** Statistical differences in growth dynamics and cellular metabolic activity between *E. faecalis* strains exposed to rotating magnetic field (5 Hz and 50 Hz) for 3, 6 and 9 h.

Data are expressed as % of control. The results are presented as a mean  $\pm$  SEM calculated using six values (three from each biological replicate); \*  $p < 0.05$ , \*\*  $p < 0.01$ , \*\*\*  $p < 0.001$ , \*\*\*\*  $p < 0.0001$ .

## 5 Hz

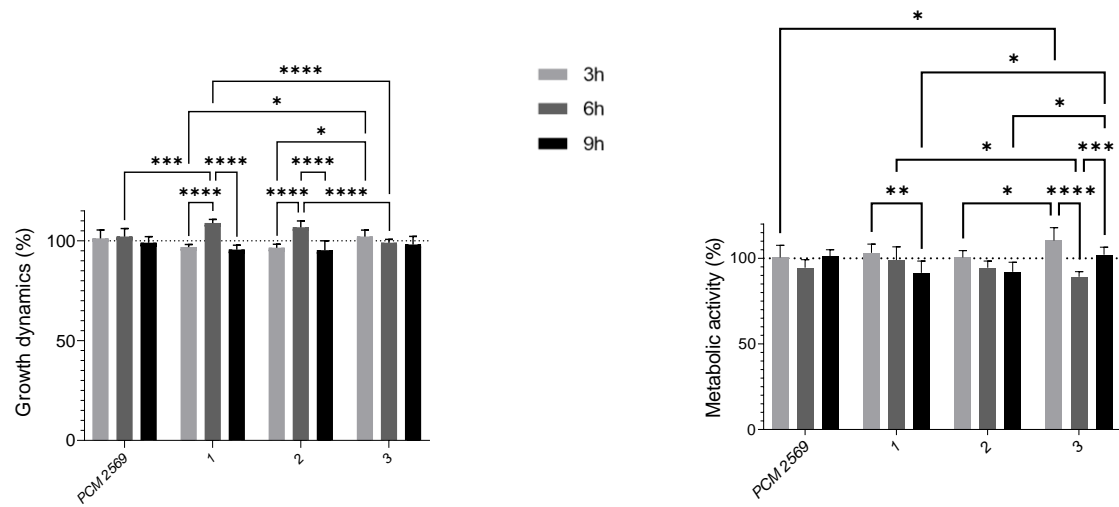

## 50 Hz

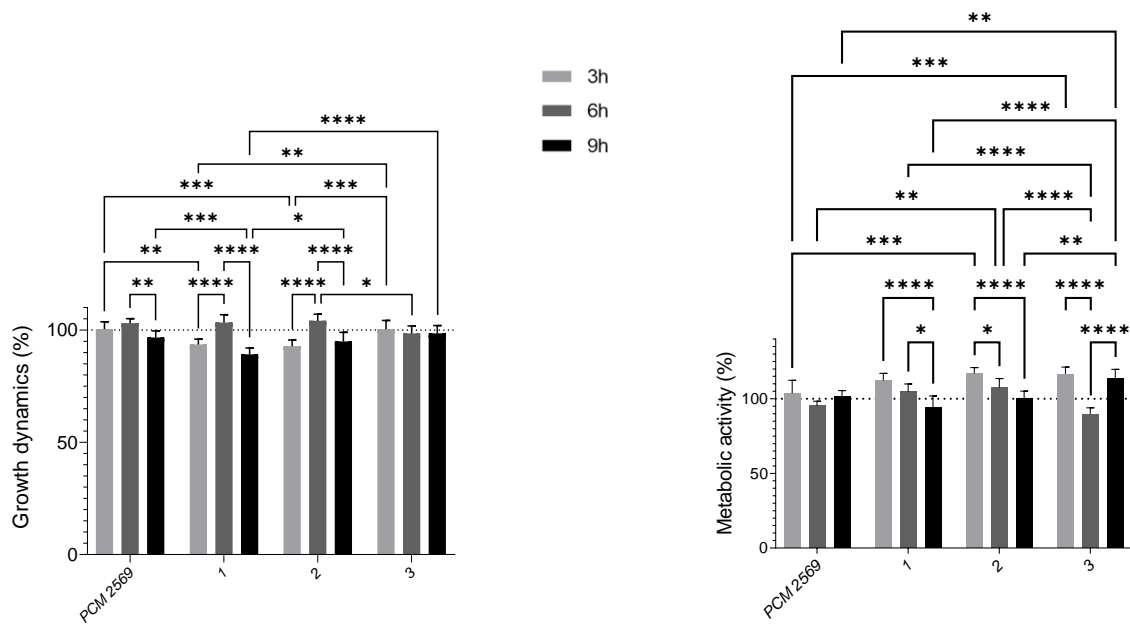

**Figure S4.** Statistical differences in growth dynamics and cellular metabolic activity between *E. cloacae* strains exposed to rotating magnetic field (5 Hz and 50 Hz) for 3, 6 and 9 h.

Data are expressed as % of control. The results are presented as a mean  $\pm$  SEM calculated using six values (three from each biological replicate); \*  $p < 0.05$ , \*\*  $p < 0.01$ , \*\*\*  $p < 0.001$ , \*\*\*\*  $p < 0.0001$ .

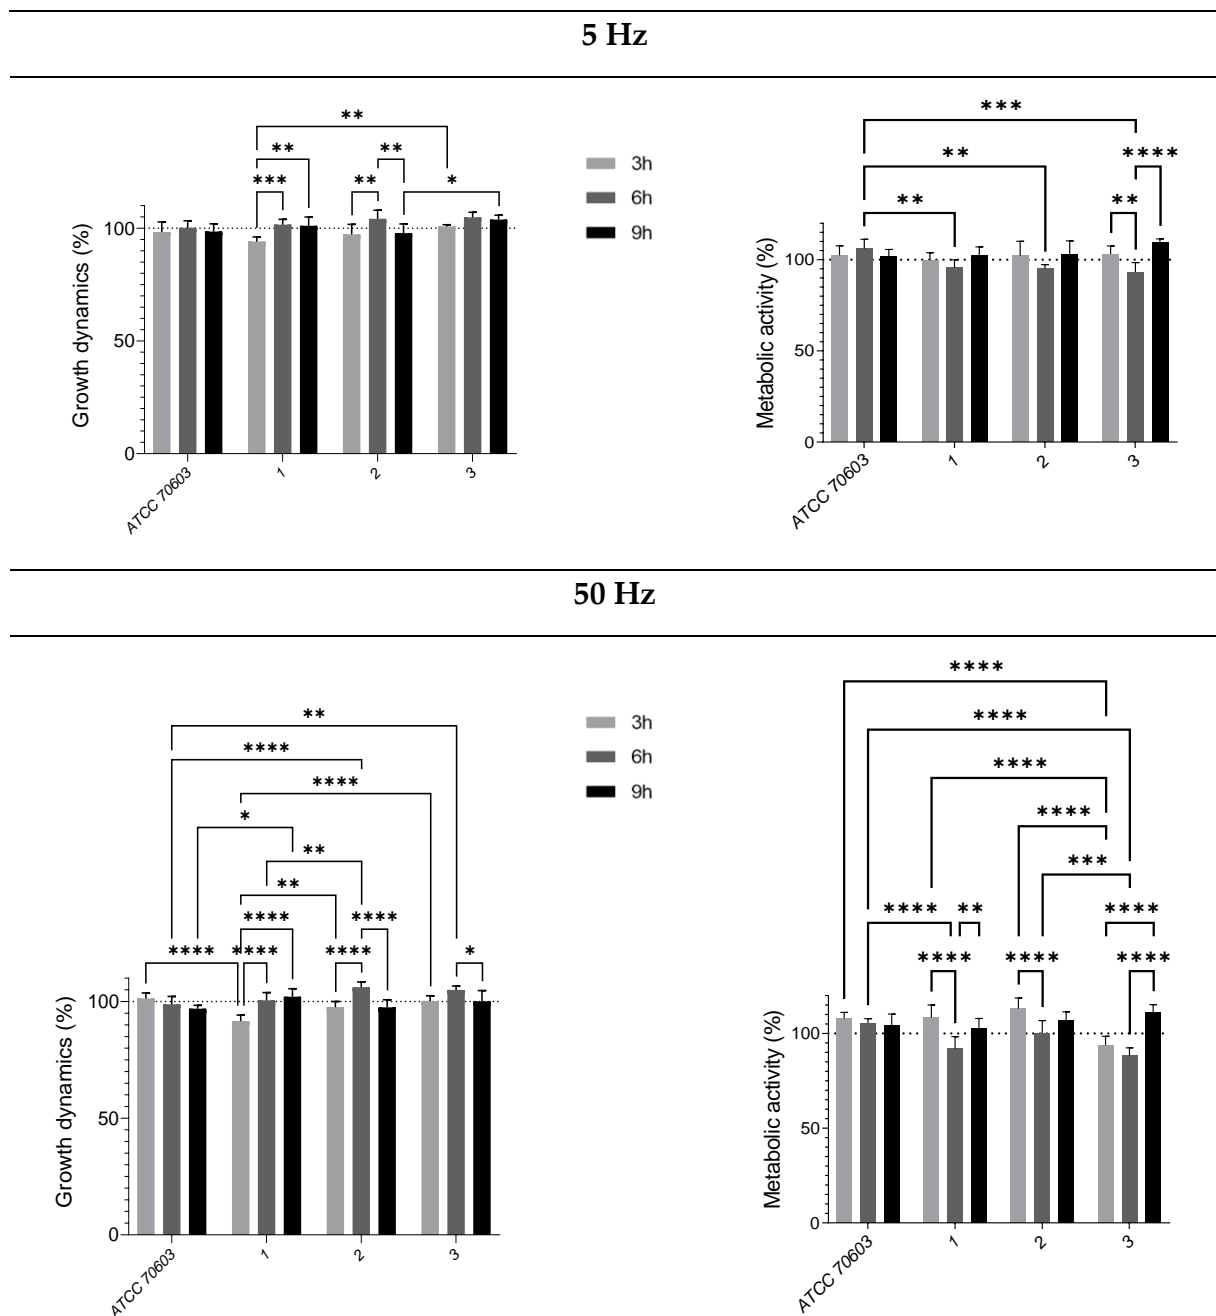

**Figure S5.** Statistical differences in growth dynamics and cellular metabolic activity between *K. pneumoniae* strains exposed to rotating magnetic field (5 Hz and 50 Hz) for 3, 6 and 9 h.

Data are expressed as % of control. The results are presented as a mean  $\pm$  SEM calculated using six values (three from each biological replicate); \*  $p < 0.05$ , \*\*  $p < 0.01$ , \*\*\*  $p < 0.001$ , \*\*\*\*  $p < 0.0001$ .

## 5 Hz

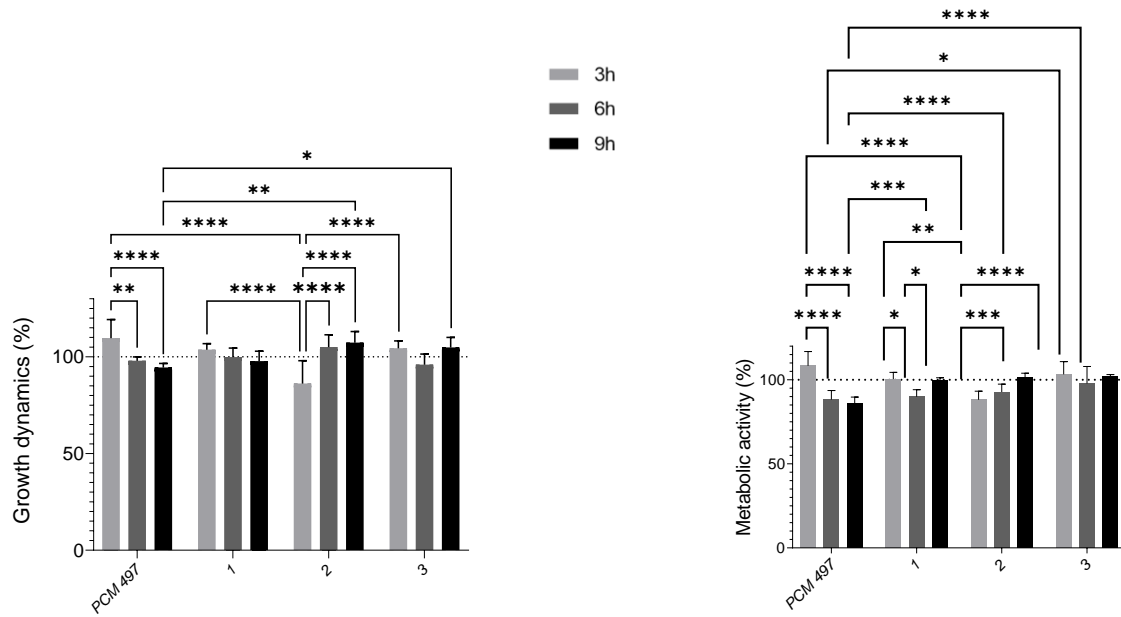

## 50 Hz

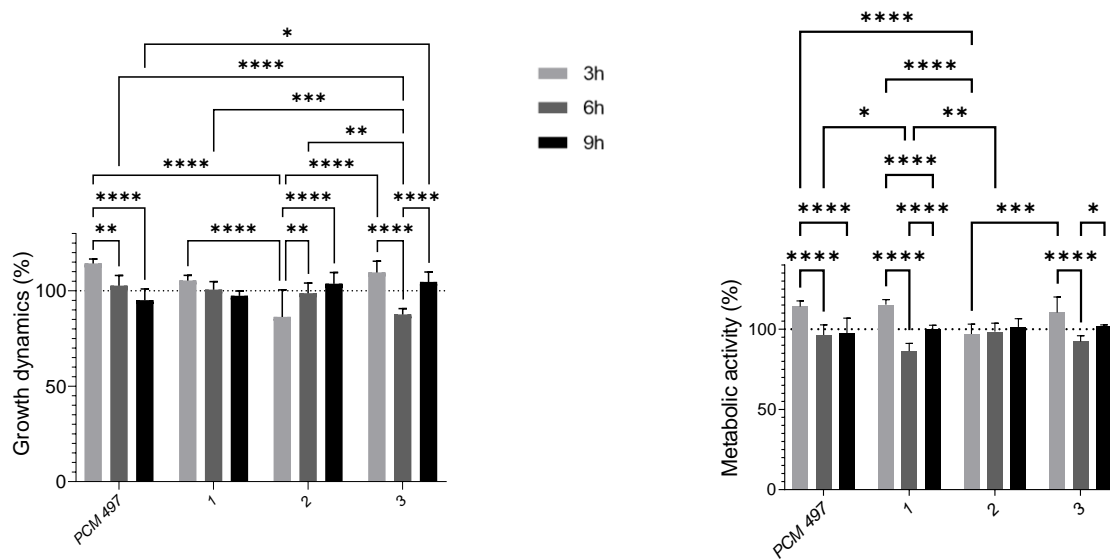

**Figure S6.** Statistical differences in growth dynamics and cellular metabolic activity between *B. cereus* strains exposed to rotating magnetic field (5 Hz and 50 Hz) for 3, 6 and 9 h.

Data are expressed as % of control. The results are presented as a mean  $\pm$  SEM calculated using six values (three from each biological replicate); \*  $p < 0.05$ , \*\*  $p < 0.01$ , \*\*\*  $p < 0.001$ , \*\*\*\*  $p < 0.0001$ .



## 5 Hz

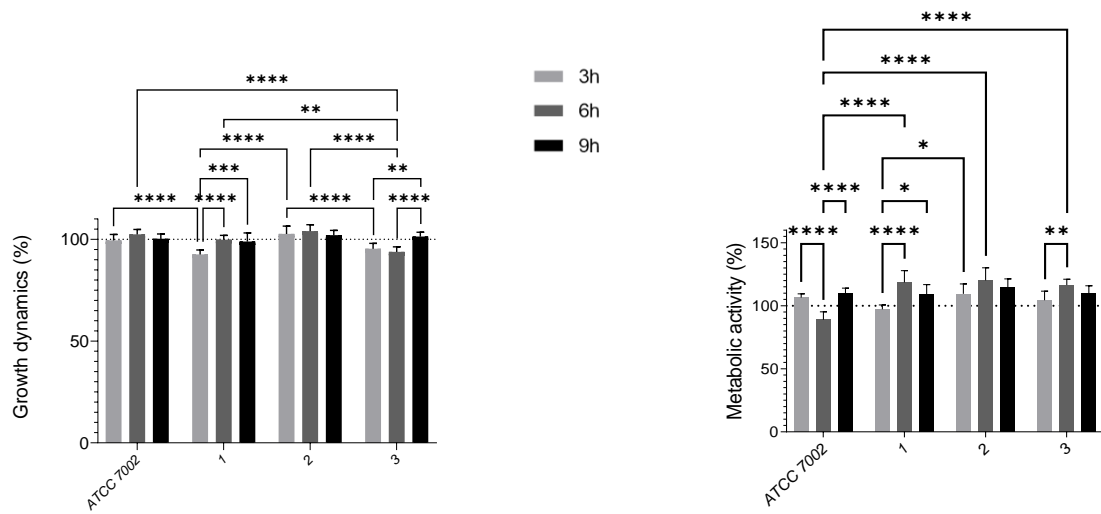

## 50 Hz

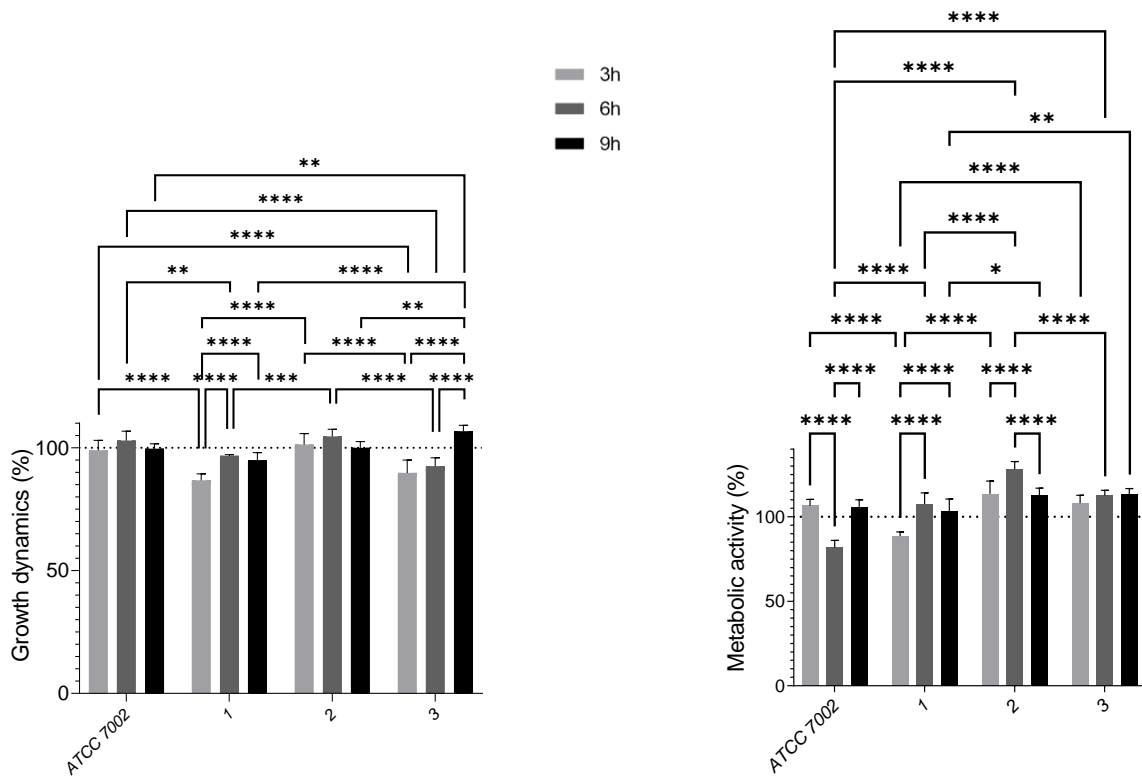

**Figure S7.** Statistical differences in growth dynamics and cellular metabolic activity between *P. mirabilis* strains exposed to rotating magnetic field (5 Hz and 50 Hz) for 3, 6 and 9 h.

Data are expressed as % of control. The results are presented as a mean  $\pm$  SEM calculated using six values (three from each biological replicate); \* p<0.05, \*\* p<0.01, \*\*\* p<0.001, \*\*\*\* p<0.0001.

## 5 Hz

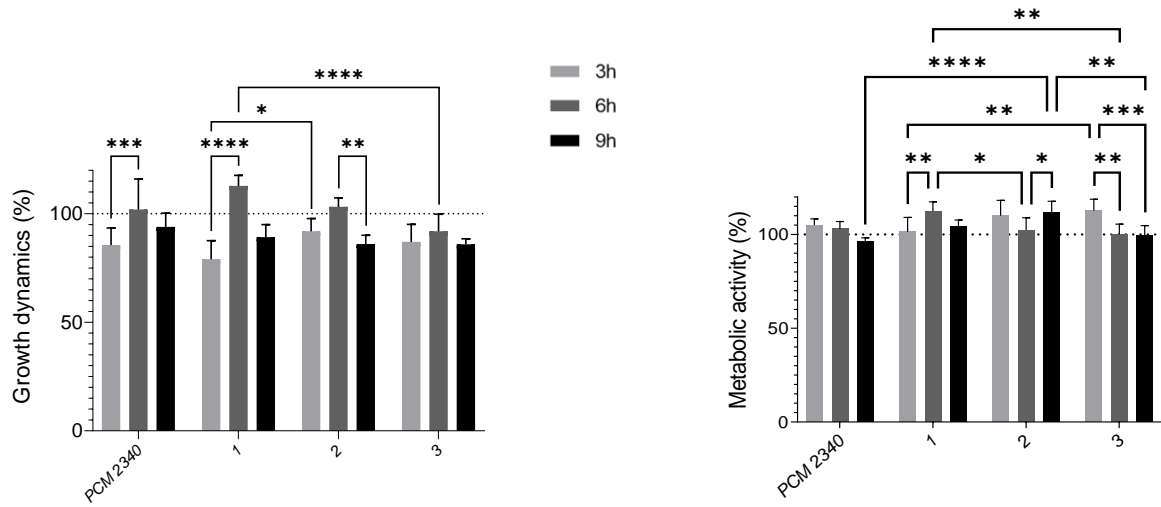

## 50 Hz

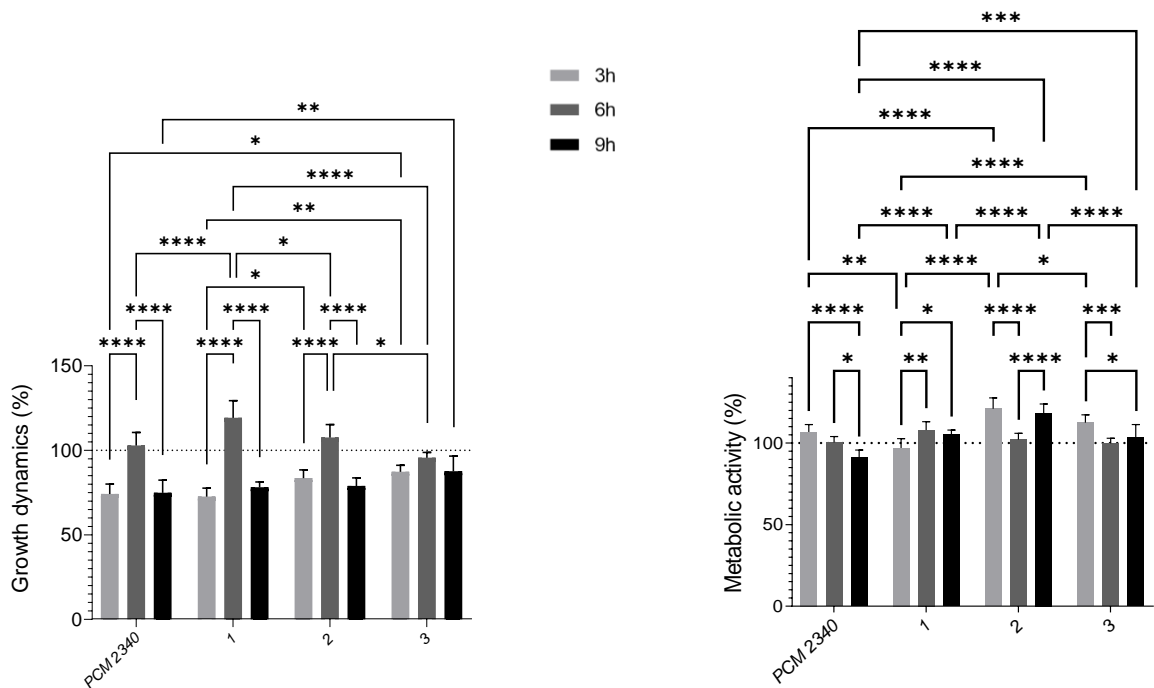

**Figure S8.** Statistical differences in growth dynamics and cellular metabolic activity between *M. catarrhalis* strains exposed to rotating magnetic field (5 Hz and 50 Hz) for 3, 6 and 9 h.

Data are expressed as % of control. The results are presented as a mean  $\pm$  SEM calculated using six values (three from each biological replicate); \* p<0.05, \*\* p<0.01, \*\*\* p<0.001, \*\*\*\* p<0.0001.
